# Supplementary material
Source: publisher site journal article supplement (https://www.dovepress.com/article/497218)
Supplement: Supplementary file 1 [file get_supplementary_file.php]

**SUPPLEMENT**

**Supplement Table 1. Correlation between scores of all questionnaires (ACT, ACQ MiniAQLQ, HADS, Nijmegen, Snot22, MiniRQLQ) in all patients, patients with ACT<20 and in patients with ACT≥20.**

|  | | **ACT** | **ACQ** | **MiniAQLQ** | **HADS** | **Nijmegen** | **SNOT22** |
| --- | --- | --- | --- | --- | --- | --- | --- |
| All patients | | | | | | | |
| ACQ | p | **<.001** | - |  |  |  |  |
|  | r | -.769 | - |  |  |  |  |
| MiniAQLQ | p | **<.001** | **<.001** |  |  |  |  |
|  | r | .721 | -.753 |  |  |  |  |
| HADS | p | **<.001** | **<.001** | **<.001** |  |  |  |
|  | r | -.308 | .300 | -.425 |  |  |  |
| Nijmegen | p | **<.001** | **<.001** | **<.001** | **<.001** |  |  |
|  | r | -.481 | .512 | .512 | .606 |  |  |
| SNOT22 | p | **<.001** | **<.001** | **<.001** | **<.001** | **<.001** |  |
|  | r | -.256 | .249 | -.346 | .219 | .387 |  |
| MiniRQLQ | p | **<.001** | **<.001** | **<.001** | **<.001** | **<.001** | **<.001** |
|  | r | -.451 | .565 | -.641 | .397 | .612 | .446 |
| Patients with ACT < 20 | | | | | | | |
| ACQ | p | **<.001** |  |  |  |  |  |
|  | r | -.568 |  |  |  |  |  |
| MiniAQLQ | p | **<.001** | **<.001** |  |  |  |  |
|  | r | .434 | -.719 |  |  |  |  |
| HADS | p | .978 | .109 | **.034** |  |  |  |
|  | r | .003 | .156 | -.207 |  |  |  |
| Nijmegen | p | .125 | **<.001** | **<.001** | **<.001** |  |  |
|  | r | -.150 | .455 | -.570 | .555 |  |  |
| SNOT22 | p | .683 | .384 | .473 | .594 | .290 |  |
|  | r | .040 | -.085 | .070 | -.052 | .104 |  |
| MiniRQLQ | p | **.018** | **<.001** | **<.001** | **.011** | **<.001** | .596 |
|  | r | -.229 | .542 | -.560 | .244 | .542 | .052 |
| Patients with ACT ≥ 20 | | | | | | | |
| ACQ | p | **<.001** |  |  |  |  |  |
|  | r | -.594 |  |  |  |  |  |
| MiniAQLQ | p | **<.001** | **<.001** |  |  |  |  |
|  | r | .483 | -.560 |  |  |  |  |
| HADS | p | **.038** | **.017** | **<.001** |  |  |  |
|  | r | -.142 | .164 | -.358 |  |  |  |
| Nijmegen | p | **<.001** | **<.001** | **<.001** | **<.001** |  |  |
|  | r | -.280 | .278 | -.544 | .551 |  |  |
| SNOT22 | p | **<.001** | **<.001** | **<.001** | **<.001** | **<.001** |  |
|  | r | -.281 | .331 | -.512 | .331 | .551 |  |
| MiniRQLQ | p | **<.001** | **<.001** | **<.001** | **<.001** | **<.001** | **<.001** |
|  | r | -.247 | .392 | -.541 | .370 | .512 | .678 |

Data is shown as p-value (p) and Spearman’s correlation coefficient (r). Significant p-values are presented in bold. ACT=Asthma Control Test, ACQ=Asthma Control Questionnaire, MiniAQLQ=mini version of Asthma Quality of Life Questionnaire, HADS=Hospital Anxiety and Depression Scale, Nijmegen=questionnaire that is used to screen patients with dysfunctional breathing such as hyperventilation syndrome, SNOT22=Sino-nasal outcome test, MiniRQLQ=mini version of Rhinoconjuctivitis Quality of Life Questionnaire. Significant p-values are shown in bold.

**Supplement Table 2. Correlation between spirometry results and the respective total score of ACT, ACQ, MiniAQLQ, HADS, Nijmegen, SNOT22, MiniRQLQ in all patients (n=319), ACT<20 (n=107), ACT≥20 (n=212).**

|  | | **ACT** | **ACQ** | **MiniAQLQ** | **HADS** | **Nijmegen** | **SNOT22** | **MiniRQLQ** |
| --- | --- | --- | --- | --- | --- | --- | --- | --- |
| **FEV1** | | | | | | | | |
| All patients | p | **.015** | **<.001** | **<.001** | .207 | **<.001** | .354 | .415 |
|  | r | .136 | -.223 | .221 | .071 | -.189 | -.052 | -.046 |
| ACT<20 | p | .415 | **.024** | **.032** | .472 | **.047** | .413 | .525 |
| r | .080 | -.218 | .208 | .070 | -.194 | -.080 | -.062 |
| ACT≥20 | P | .728 | .054 | **.050** | **.023** | .090 | .930 | .406 |
| r | .024 | -.133 | -.135 | .156 | -.117 | -.006 | .057 |
| **FEV1 % of predicted** | | | | | | | | |
| All patients | p | .093 | **.003** | **.030** | .079 | .905 | .787 | .274 |
| r | .095 | -.169 | .122 | .099 | .007 | .015 | -.062 |
| ACT<20 | p | .689 | .109 | .305 | .563 | .233 | .726 | .902 |
| r | .039 | -.157 | .101 | .057 | -.117 | -.035 | -.012 |
| ACT≥20 | p | .751 | .050 | .427 | **.012** | .066 | .322 | .621 |
| r | .022 | -.135 | .055 | .173 | .127 | .069 | -.034 |
| **FVC** | | | | | | | | |
| All patients | p | **.009** | **<.001** | **<.001** | .877 | **<.001** | .073 | .096 |
|  | r | .146 | -.236 | .258 | .009 | -.251 | -.101 | -.093 |
| ACT<20 | p | .281 | **.012** | **.007** | .929 | **.009** | .321 | .159 |
| r | .105 | -.241 | .259 | .009 | -.253 | -.097 | -.137 |
| ACT≥20 | p | .606 | **.049** | **.009** | .183 | **.006** | .166 | .862 |
| r | .036 | -.136 | .180 | .092 | -.187 | -.096 | .012 |
| **FVC % of predicted** | | | | | | | | |
| All patients | p | **.023** | **<.001** | **<.001** | .686 | .216 | .209 | **.025** |
| r | .127 | -.232 | .211 | .023 | -.070 | -.071 | -.126 |
| ACT<20 | p | .378 | **.010** | .061 | .627 | .173 | .342 | .341 |
| r | .086 | -.249 | .183 | .048 | -.133 | -.093 | -.093 |
| ACT≥20 | p | .989 | **.038** | .060 | .272 | .601 | .508 | .273 |
| r | .001 | -.142 | .130 | .076 | .036 | -.046 | -.076 |

Data is shown as p-value (p) and Spearman’s correlation coefficient (r). Significant p-values are presented in bold. ACT=Asthma Control Test, ACQ=Asthma Control Questionnaire, MiniAQLQ=mini version of Asthma Quality of Life Questionnaire, HADS=Hospital Anxiety and Depression Scale, Nijmegen=questionnaire that is used to screen patients with dysfunctional breathing such as hyperventilation syndrome, SNOT22=Sino-nasal outcome test, MiniRQLQ=mini version of Rhinoconjuctivitis Quality of Life Questionnaire. FEV1=forced expiratory volume in 1 second, FVC=forced vital capacity

**Supplement Table 3a. Correlations between questionnaire scores and Forced Oscillation Technique measurements in patients with ACT<20 (n=107).**

|  |  | **R5in** | **R5exp** | **R5tot** | **R19in** | **R19exp** | **R19tot** | **R5-R19in** | **R5-R19ex** | **R5-R19tot** | **X5in** | **X5exp** | **X5tot** |
| --- | --- | --- | --- | --- | --- | --- | --- | --- | --- | --- | --- | --- | --- |
| **ACTsum** | p | .265 | .104 | .233 | .501 | .573 | .432 | **.049** | **.042** | .136 | .063 | .109 | .073 |
|  | r | -.109 | -.160 | -.118 | -.066 | -.056 | -.078 | -.192 | -.200 | -.145 | .180 | .157 | .175 |
| ACTq1 | P | .413 | .389 | .539 | .824 | .800 | .721 | .214 | .531 | .299 | .149 | .476 | .243 |
|  | r | -.080 | -.085 | -.061 | -.022 | -.025 | -.035 | -.122 | -.062 | -.101 | .140 | .070 | .115 |
| ACTq2 | p | .647 | .867 | .554 | .792 | .920 | .964 | .722 | .716 | .743 | .802 | .659 | .915 |
|  | r | .045 | .017 | .059 | .026 | .010 | .005 | -.035 | .036 | .032 | .025 | -.044 | -.011 |
| ACTq3 | p | .970 | .459 | .551 | .801 | .308 | .531 | .149 | .528 | .159 | **.012** | .175 | **.025** |
|  | r | .004 | -.073 | -.059 | .025 | -.101 | -.062 | -.141 | -.063 | -.137 | .241 | .133 | .219 |
| ACTq4 | p | .485 | .329 | .578 | .847 | .360 | .639 | .342 | **.003** | .715 | .576 | .548 | .966 |
|  | r | -.068 | -.096 | -.055 | -.019 | .091 | .046 | -.093 | -.284 | -.036 | -.055 | .059 | .004 |
| ACTq5 | p | .151 | .234 | .346 | .275 | .401 | .319 | .124 | .303 | .235 | .352 | .376 | .481 |
|  | r | -.140 | -.117 | -.093 | -.107 | -.083 | -.099 | -.150 | -.102 | -.116 | .091 | .087 | .069 |
| **ACQsum** | p | .085 | **.022** | .065 | .501 | .265 | .277 | **.022** | **.033** | 0.51 | **<.001** | **.003** | **<.001** |
|  | r | .167 | .224 | .181 | .066 | .110 | .108 | .222 | .209 | .189 | -.346 | -.284 | -.370 |
| ACQq1 | p | .216 | .053 | .084 | .299 | **.032** | .059 | .087 | .187 | .111 | **.003** | **.027** | **.003** |
|  | r | .120 | .190 | .170 | .102 | .210 | .186 | .167 | .130 | .155 | -.288 | -.216 | -.289 |
| ACQq2 | p | .460 | **.024** | .088 | .690 | .099 | .211 | .266 | **.032** | .214 | **.014** | .058 | **.009** |
|  | r | .072 | .221 | .168 | .039 | .163 | .124 | .109 | .210 | .121 | -.236 | -.186 | -.254 |
| ACQq3 | p | .251 | .288 | .408 | .756 | .826 | .860 | .124 | .223 | .236 | .050 | .088 | **.026** |
|  | r | .112 | .105 | .082 | .031 | -.022 | .018 | .150 | .121 | .116 | -.190 | -.167 | -.217 |
| ACQq4 | p | .399 | .276 | .502 | .757 | .472 | .572 | .503 | .964 | .705 | .083 | .193 | .064 |
|  | r | .082 | .107 | .067 | .030 | .071 | .056 | .066 | .005 | .037 | -.169 | -.128 | -.181 |
| ACQq5 | p | .240 | .146 | .335 | .979 | .998 | .927 | **.023** | **.014** | .061 | **.002** | **.010** | **<.001** |
|  | r | .115 | .143 | .095 | .003 | .000 | .009 | .220 | .241 | .182 | -.295 | -.249 | -.317 |
| **MiniAQLQ** | p | .233 | .112 | .201 | .474 | .282 | .290 | .330 | .559 | .441 | **.024** | .101 | **.020** |
|  | r | -.177 | -.157 | -.127 | -.071 | -.107 | -.105 | -.096 | -.058 | -.076 | .220 | .162 | .227 |
| **HADS** | P | .635 | .095 | .102 | .338 | .086 | .210 | .731 | .906 | .849 | .168 | .325 | .117 |
|  | r | .046 | .164 | .161 | .094 | .169 | .124 | -.034 | .012 | .019 | -.134 | -.097 | -.154 |
| **Nijmegen** | p | .125 | **.026** | **.046** | **.011** | **.001** | **.003** | .955 | .915 | .978 | .066 | .606 | .189 |
|  | r | .150 | .218 | .197 | .246 | .309 | .286 | .006 | .011 | -.003 | -.179 | -.051 | -.130 |
| **SNOT22** | p | .517 | .712 | .881 | .900 | .816 | .795 | .643 | .547 | .689 | .276 | .860 | .761 |
|  | r | .064 | -.037 | -.015 | .012 | .023 | .026 | .046 | -.060 | .039 | -.107 | .017 | .030 |
| **MiniRQLQ** | p | .210 | .062 | .152 | .146 | .092 | .096 | .376 | .112 | .586 | .107 | .249 | .108 |
|  | r | .122 | .183 | .142 | .142 | .166 | .164 | .087 | .157 | .053 | -.157 | -.113 | -.158 |

Data is shown as p-value (p) and Spearman’s correlation coefficient (r). Significant p-values are presented in bold. ACT=Asthma Control Test, ACQ=Asthma Control Questionnaire, q1=question 1, q2=question 2, q3=question 3, q4=question 4, q5=question 5, sum=total, MiniAQLQ=mini version of Asthma Quality of Life Questionnaire, HADS=Hospital Anxiety and Depression Scale, Nijmegen=questionnaire that is used to screen patients with dysfunctional breathing such as hyperventilation syndrome, SNOT22=Sino-nasal outcome test, MiniRQLQ=mini version of Rhinoconjuctivitis Quality of Life Questionnaire. R5=Resistance at 5Hz, R19=Resistance at 19Hz, X5=Reactance at 5 Hz, in=inspiratory, exp=expiratory, tot=total.

|  |  | **R5in** | **R5exp** | **R5tot** | **R19in** | **R19exp** | **R19tot** | **R5-R19in** | **R5-R19ex** | **R5-R19tot** | **X5in** | **X5exp** | **X5tot** |
| --- | --- | --- | --- | --- | --- | --- | --- | --- | --- | --- | --- | --- | --- |
| **ACTsum** | p | **.004** | **.003** | **.003** | **.004** | **.002** | **.001** | .248 | .302 | .275 | .517 | .334 | .593 |
|  | r | -.197 | -.207 | -.208 | -.198 | -.212 | -.225 | -.080 | -.073 | -.075 | .045 | .068 | .038 |
| ACTq1 | P | **.006** | **.040** | **.023** | **.003** | **.035** | **.021** | .393 | .097 | .257 | .312 | .241 | .332 |
|  | r | -.187 | -.144 | -.159 | -.201 | -.148 | -.163 | -.059 | -.117 | -.078 | .070 | .083 | .068 |
| ACTq2 | p | **<.001** | **.002** | **.002** | **<.001** | **.004** | **.001** | .642 | .081 | .619 | **.003** | **.003** | **.003** |
|  | r | -.233 | -.220 | -.219 | -.264 | -.200 | -.229 | -.032 | -.123 | -.034 | .202 | .210 | .209 |
| ACTq3 | p | .939 | .486 | .705 | .594 | .761 | .980 | .392 | .649 | .443 | .229 | .558 | .313 |
|  | r | .005 | -.049 | -.027 | .037 | -.022 | .002 | -.059 | -.032 | -.053 | .083 | .041 | .071 |
| ACTq4 | p | .168 | .115 | .092 | .128 | .093 | .096 | .785 | .532 | .895 | .375 | .918 | .396 |
|  | r | -.095 | -.111 | -.118 | -.105 | -.118 | -.118 | -.019 | -.044 | -.009 | -.061 | .007 | -.060 |
| ACTq5 | p | .284 | .290 | .298 | .224 | .252 | .162 | .930 | .990 | .920 | .923 | .482 | .364 |
|  | r | -.074 | -.074 | -.073 | -.084 | -.081 | -.099 | -.006 | -.001 | -.007 | -.007 | -.049 | -.064 |
| **ACQsum** | p | **.047** | **.007** | **.014** | .179 | .088 | .081 | .231 | **.038** | .196 | .240 | **.030** | .122 |
|  | r | .137 | .188 | .173 | .093 | .120 | .123 | .083 | .146 | .089 | -.081 | -.152 | -.109 |
| ACQq1 | p | .828 | .533 | .775 | .192 | .429 | .275 | .318 | .082 | .380 | .057 | .059 | .063 |
|  | r | -.015 | .044 | .020 | -.090 | -.056 | -.077 | .069 | .123 | .061 | -.131 | -.132 | -.131 |
| ACQq2 | p | .150 | .094 | .118 | .402 | .229 | .285 | .271 | .415 | .368 | .251 | .495 | .411 |
|  | r | .099 | .118 | .110 | .058 | .085 | .076 | .076 | .058 | .062 | -.079 | -.048 | -.058 |
| ACQq3 | p | .381 | .118 | .165 | .494 | .430 | .417 | .990 | .304 | .921 | .927 | .165 | .566 |
|  | r | .060 | .110 | .097 | .047 | .056 | .057 | -.001 | .073 | .007 | .006 | -.097 | -.041 |
| ACQq4 | p | 0.57 | **.024** | **.032** | .116 | .183 | .102 | .423 | **.034** | .420 | .743 | **.011** | .130 |
|  | r | .131 | .158 | .150 | .109 | .094 | .115 | .056 | .149 | .056 | -.023 | -.177 | -.106 |
| ACQq5 | p | .124 | .149 | .117 | .307 | .185 | .160 | .227 | .162 | .120 | .148 | .205 | .265 |
|  | r | .106 | .102 | .110 | .071 | .094 | .099 | .084 | .099 | .107 | -.100 | -.089 | -.079 |
| **MiniAQLQ** | p | **.015** | **.006** | **.008** | .072 | .092 | .076 | .330 | **.023** | .088 | **.002** | **.003** | **.004** |
|  | r | -.167 | -.194 | -.186 | -.125 | -.119 | -.126 | -.096 | -.161 | -.118 | .215 | .205 | .203 |
| **HADS** | P | .905 | .832 | .863 | .189 | .434 | .344 | .731 | .123 | .025 | .376 | .409 | .975 |
|  | r | -.008 | -.015 | -.012 | .091 | .055 | .067 | -.034 | -.109 | -.154 | -.061 | .058 | .002 |
| **Nijmegen** | p | **.011** | **.004** | **.002** | **.008** | **.004** | **.003** | .955 | .238 | .463 | **.002** | **.019** | **.011** |
|  | r | .174 | .203 | .211 | .183 | .202 | .207 | .006 | .083 | .051 | -.215 | -.164 | -.178 |
| **SNOT22** | p | .099 | **.004** | **.010** | .115 | **.041** | .066 | .643 | **.010** | .450 | **.018** | .055 | **.017** |
|  | r | .114 | .200 | .181 | .109 | .144 | .130 | .046 | .182 | .052 | -.162 | -.135 | -.168 |
| **MiniRQLQ** | p | .113 | .070 | .097 | .077 | .178 | .137 | .376 | .171 | .743 | .407 | .697 | .447 |
|  | r | .109 | .127 | .117 | .122 | .095 | .105 | .087 | .097 | .023 | -.057 | -.027 | -.054 |

**Supplement Table 3b. Correlations between questionnaire scores and Forced Oscillation Technique measurements in patients with ACT≥20 (n=212)**

Data is shown as p-value (p) and Spearman’s correlation coefficient (r). Significant p-values are presented in bold. ACT=Asthma Control Test, ACQ=Asthma Control Questionnaire, q1=question 1, q2=question 2, q3=question 3, q4=question 4, q5=question 5, sum=total, MiniAQLQ=mini version of Asthma Quality of Life Questionnaire, HADS=Hospital Anxiety and Depression Scale, Nijmegen=questionnaire that is used to screen patients with dysfunctional breathing such as hyperventilation syndrome, SNOT22=Sino-nasal outcome test, MiniRQLQ=mini version of Rhinoconjuctivitis Quality of Life Questionnaire. R5=Resistance at 5Hz, R19=Resistance at 19Hz, X5=Reactance at 5 Hz, in=inspiratory, exp=expiratory, tot=total.

**Supplement Table 4. Linear regression analysis between ACT score and Forced Oscillation Technique measurements after adjustment for age and sex.**

| **ACT-score** |  | **R5in** | **R5exp** | **R5tot** | **R19in** | **R19exp** | **R19tot** | **R5-R19in** | **R5-R19ex** | **R5-R19tot** | **X5in** | **X5exp** | **X5tot** |
| --- | --- | --- | --- | --- | --- | --- | --- | --- | --- | --- | --- | --- | --- |
| All patients (n=319) | p | .28 | **.001** | **.015** | **.037** | .165 | .134 | .377 | **.001** | .235 | .859 | **<.001** | **.003** |
| B | -.44 | -.555 | -.475 | -.609 | -.428 | -.502 | -.250 | **-.833** | -.376 | .066 | .796 | .844 |
| ACT<20 (n=107) | p | .231 | .212 | .487 | .456 | .791 | .622 | .204 | .100 | .596 | .156 | .352 | .254 |
| B | -.266 | -.227 | -.146 | -.287 | -.096 | -.194 | -.474 | -.443 | -.182 | .637 | .177 | .303 |
| ACT≥20 (n=212) | p | **.017** | **.006** | **.007** | **.003** | **.002** | **.003** | 0.93 | .304 | .374 | .447 | .313 | .644 |
| B | -.291 | -.303 | -.324 | -.457 | -.532 | -.557 | -.013 | -.172 | -.172 | .157 | .216 | .098 |

Data is shown as p-value (p) and Beta-value (B). Significant p-values are presented in bold. ACT=asthma control test, R5=Resistance at 5Hz, R19=Resistance at 19Hz, X5=Reactance at 5 Hz, in=inspiratory, exp=expiratory.

**Supplement Table 5a. Correlations between the Nijmegen questionnaire scores (as separate questions) and Forced Oscillation Technique measurements in patients with ACT<20 (n=107).**

|  |  | **R5in** | **R5exp** | **R5tot** | **R19in** | **R19exp** | **R19tot** | **R5-R19in** | **R5-R19ex** | **R5-R19tot** | **X5in** | **X5exp** | **X5tot** |
| --- | --- | --- | --- | --- | --- | --- | --- | --- | --- | --- | --- | --- | --- |
| Q1-chest pain | p | .383 | .618 | .616 | .943 | .497 | .771 | .350 | .168 | .586 | .237 | .185 | .753 |
| r | -.086 | .049 | -.050 | .007 | .068 | .029 | -.092 | -.137 | -.053 | -.116 | .131 | .031 |
| Q2-feeling tense | P | .378 | **.030** | **.026** | .168 | **.006** | **.041** | .737 | .605 | .483 | .158 | .401 | .169 |
| r | .086 | .214 | .220 | .136 | .269 | .202 | .033 | .052 | .069 | -.138 | -.083 | -.136 |
| Q3-blurred vision | p | **.008** | **<.001** | **<.001** | **<.001** | **<.001** | **<.001** | .278 | **.030** | .447 | .318 | .082 | .086 |
| r | .255 | .359 | .343 | .328 | .342 | .344 | .107 | .215 | .075 | -.098 | -.171 | -.169 |
| Q4-dizzy spells | p | .122 | .186 | .121 | **.031** | **.026** | **.026** | .619 | .526 | .788 | .171 | .940 | .577 |
| r | .151 | .131 | .154 | .211 | .219 | .219 | -.049 | -.063 | -.026 | -.134 | -.007 | -.055 |
| Q5-feeling confused | p | **.028** | **.033** | **.021** | **.004** | **.007** | **.005** | .937 | .688 | .647 | .780 | .904 | .803 |
| r | .213 | .209 | .228 | .282 | .265 | .275 | .008 | .040 | .045 | .027 | .012 | .025 |
| Q6-faster/deeper breathing | p | .117 | .271 | .328 | .108 | .144 | .118 | .254 | .964 | .579 | .083 | .979 | .399 |
| r | .153 | .109 | .097 | .158 | .145 | .155 | .112 | -.005 | .055 | -.169 | .003 | -.084 |
| Q7-short of breath | p | .067 | **.027** | .063 | **.029** | .053 | **.028** | .284 | .176 | .480 | **.042** | .139 | .067 |
| r | .179 | .217 | .184 | .214 | .191 | .216 | .106 | .134 | .069 | -.198 | -.146 | -.180 |
| Q8-tight feelings in the chest | p | .878 | .795 | .999 | .404 | .258 | .329 | .155 | .523 | .222 | .180 | .332 | .854 |
| r | -.015 | .026 | .000 | .082 | .112 | .097 | -.140 | -.064 | -.120 | -.131 | .096 | .018 |
| Q9-bloated feeling in the stomach | p | **.010** | **<.001** | **<.001** | **.017** | **.003** | **.004** | .070 | **.019** | .142 | .204 | **<.001** | **.003** |
| r | .249 | .335 | .323 | .232 | .286 | .283 | .178 | .231 | .144 | -.124 | -.321 | -.290 |
| Q10-tingling fingers | p | .502 | .403 | .553 | .057 | .081 | .056 | .750 | .956 | .423 | .539 | .582 | .950 |
| r | .066 | .083 | .059 | .186 | .173 | .189 | -.031 | -.006 | -.079 | -.060 | .055 | -.006 |
| Q11-unable to breathe deeply | p | **.035** | **.033** | **.031** | **.032** | .098 | **.038** | .384 | .551 | .199 | .536 | .361 | .362 |
| r | .205 | .210 | .213 | 210 | .164 | .204 | .086 | .059 | .126 | -.061 | -.090 | -.090 |
| Q12-stiff fingers or arms | p | .507 | .151 | .261 | .195 | .062 | .117 | .453 | .595 | .930 | .134 | .130 | .068 |
| r | .065 | .142 | .112 | .127 | .185 | .155 | .074 | .053 | .009 | -.146 | -.149 | -.180 |
| Q13-tight feelings around the mouth | p | .598 | .524 | .363 | .796 | .361 | .615 | .780 | .985 | .760 | .922 | .941 | .621 |
| r | .052 | .063 | .091 | .026 | .091 | .050 | .028 | .002 | .030 | .010 | .007 | -.049 |
| Q14-cold hands or feet | P | .953 | .722 | .948 | .332 | .059 | .146 | .234 | **.013** | .403 | .749 | .145 | .511 |
| r | -.006 | -.035 | -.007 | .096 | .187 | .144 | -.117 | -.245 | -.082 | -.031 | .144 | .065 |
| Q15-palpitations | p | .804 | .762 | .551 | .531 | .593 | .483 | .909 | .450 | .663 | .055 | .466 | .967 |
| r | -.024 | -.030 | -.059 | .062 | .053 | .070 | .011 | -.075 | -.043 | -.187 | .072 | -.004 |
| Q16-feeling of anxiety | p | .728 | .100 | .130 | .478 | .052 | .200 | .732 | .804 | .991 | .101 | .178 | **.039** |
| r | .034 | .162 | .150 | .070 | .192 | .127 | -.034 | .025 | .001 | -.160 | -.133 | -.203 |

Data is shown as p-value (p) and Spearman’s correlation coefficient (r). Significant p-values are presented in bold. R5=Resistance at 5Hz, R19=Resistance at 19Hz, X5=Reactance at 5 Hz, in=inspiratory, exp=expiratory. The Nijmegen questionnaire is used to screen patients with dysfunctional breathing such as hyperventilation syndrome. There are 16 items, Q1-Q16, (related to symptoms of hyperventilation syndrome) to be answered on a 5-point scale ranging from 'never' (0) to 'very often' (4).

**Supplement Table 5b. Correlations between the Nijmegen questionnaire score (as separate questions) and Forced Oscillation Technique measurements in patients with ACT≥20 (n=212).**

|  |  | **R5in** | **R5exp** | **R5tot** | **R19in** | **R19exp** | **R19tot** | **R5-R19in** | **R5-R19ex** | **R5-R19tot** | **X5in** | **X5exp** | **X5tot** |
| --- | --- | --- | --- | --- | --- | --- | --- | --- | --- | --- | --- | --- | --- |
| Q1-chest pain | p | .384 | .241 | .203 | .652 | .554 | .595 | .509 | .295 | .462 | .666 | .369 | .609 |
| r | .060 | .082 | .089 | .031 | .042 | .038 | .046 | .074 | .051 | -.030 | -.063 | .036 |
| Q2-feeling tense | P | .306 | .137 | .106 | .074 | .066 | **.049** | .948 | .768 | .880 | **.004** | .341 | .089 |
|  | r | .071 | .105 | .113 | .124 | .129 | .139 | -.005 | .021 | -.010 | -.196 | -.067 | -.120 |
| Q3-blurred vision | p | .463 | .528 | .454 | .193 | .381 | .308 | .868 | .570 | .778 | .201 | .817 | .493 |
|  | r | .051 | .044 | .053 | .090 | .062 | .072 | .012 | .040 | .019 | -.088 | -.016 | -.048 |
| Q4-dizzy spells | p | **.037** | **.007** | **.007** | .103 | .069 | .056 | .169 | .119 | .155 | **.020** | **.021** | **.024** |
|  | r | .143 | .189 | .189 | .113 | .128 | .134 | .095 | .110 | .098 | -.161 | -.161 | -.159 |
| Q5-feeling confused | p | .383 | .095 | .108 | .118 | .053 | **.050** | .781 | .601 | .692 | .091 | .227 | .296 |
| r | .060 | .117 | .113 | .108 | .137 | .138 | -.019 | .037 | -.027 | -.117 | -.085 | -.074 |
| Q6-faster/deeper breathing | p | **.003** | **<.001** | **<.001** | **<.001** | **<.001** | **<.001** | .801 | .121 | .851 | .181 | .108 | .177 |
| r | .201 | .247 | .239 | .252 | .251 | .265 | .018 | .110 | .013 | -.093 | -.113 | -.095 |
| Q7-short of breath | p | **<.001** | **<.001** | **<.001** | **.003** | **<.001** | **<.001** | .112 | .079 | .167 | **.003** | **<.001** | **<.001** |
|  | r | .254 | .262 | .268 | .203 | .233 | .255 | .110 | .124 | .095 | -.204 | -.247 | -.239 |
| Q8-tight feelings in the chest | p | .853 | .787 | .718 | .830 | .780 | .805 | .907 | .852 | .886 | .413 | .288 | .526 |
| r | .013 | .019 | .025 | .015 | .020 | .018 | .008 | .013 | .010 | -.057 | -.075 | -.045 |
| Q9-bloated feeling in the stomach | p | .793 | .769 | .799 | .491 | .943 | .822 | .440 | .422 | .622 | .157 | 1.000 | .848 |
| r | -.018 | .021 | .018 | -.048 | -.005 | -.016 | .054 | .057 | .034 | -.098 | .000 | -.014 |
| Q10-tingling fingers | p | .127 | .089 | .064 | .230 | .110 | .118 | .059 | .191 | **.026** | **.029** | .084 | .101 |
| r | .105 | .119 | .130 | .083 | .113 | .110 | .131 | .092 | .153 | -.150 | -.121 | -.115 |
| Q11-unable to breathe deeply | p | **.019** | **.034** | **.024** | .053 | **.046** | **.040** | .726 | .730 | .704 | **.007** | **.020** | **.019** |
| r | .161 | .149 | .158 | .133 | .140 | .145 | -.024 | .024 | -.026 | -.186 | -.163 | -.164 |
| Q12-stiff fingers or arms | p | .218 | .137 | .136 | .889 | .601 | .796 | **.004** | **<.001** | **.003** | .198 | **.041** | .133 |
| r | .085 | .104 | .105 | .010 | -.037 | -.018 | .199 | .250 | .204 | -.089 | -.143 | -.106 |
| Q13-tight feelings around the mouth | p | .488 | .536 | .501 | .925 | .993 | .929 | .311 | .688 | .517 | .784 | .617 | .505 |
| r | -.048 | -.044 | -.047 | .007 | .001 | .006 | -.070 | -.028 | -.045 | -.019 | .035 | .047 |
| Q14-cold hands or feet | P | .420 | .360 | .287 | **.042** | **.016** | **.026** | .078 | .098 | .139 | **.033** | .679 | .536 |
| r | .056 | .064 | .075 | .141 | .170 | .156 | -.122 | -.117 | -.102 | -.147 | .029 | -.044 |
| Q15-palpitations | p | .104 | .394 | .198 | .546 | .649 | .468 | .095 | .364 | .103 | .132 | .716 | .495 |
|  | r | .112 | .060 | .090 | .042 | .032 | .051 | .116 | .064 | .112 | -.104 | -.026 | -.048 |
| Q16-feeling of anxiety | p | .496 | .190 | .203 | **.033** | **.025** | **.025** | **.043** | .368 | .051 | .342 | .998 | .955 |
| r | .047 | .092 | .090 | .148 | .158 | .158 | -.140 | -.064 | -.134 | -.066 | .000 | .004 |

Data is shown as p-value (p) and Spearman’s correlation coefficient (r). Significant p-values are presented in bold. R5=Resistance at 5Hz, R19=Resistance at 19Hz, X5=Reactance at 5 Hz, in=inspiratory, exp=expiratory. The Nijmegen questionnaire is used to screen patients with dysfunctional breathing such as hyperventilation syndrome. There are 16 items, Q1-Q16, (related to symptoms of hyperventilation syndrome) to be answered on a 5-point scale ranging from 'never' (0) to 'very often' (4).

Supplemental Figure 1

**Supplemental Figure 1**. Frequency distribution of number of subjects with asthma with the separate scores from MiniRQLQ (A) and Snot-22 (B) grouped according to uncontrolled (black bars) or controlled (gray bars) asthma based on an ACT score of < or ≥20.

Supplemental Figure 2

A

B

C

D

R5insp

R5exp

R5tot

R19insp

R19exp

R19tot

R5-R19insp

R5-R19exp

R5-R19tot

X5insp

X5exp

X5tot

**Supplemental Figure 2**. Box plots of R5 (A), R19 (B), R5-R19 (C), and X5 (D) in asthma groups separated according to ACT < or ≥20. insp=inspiratory, exp=expiratory, tot=total. P-values were derived from statistical analyses using the Mann-Whitney U test for comparisons between separate groups.
